# Supplementary material for: New Software for the Fast Estimation of Population Recombination Rates (FastEPRR) in the Genomic Era
Source: Oxford University Press journal article supplement (doi:10.1534/g3.116.028233), 2016-06-01
Supplement: 028233_figures2.pdf [file 028233_figures2.pdf]

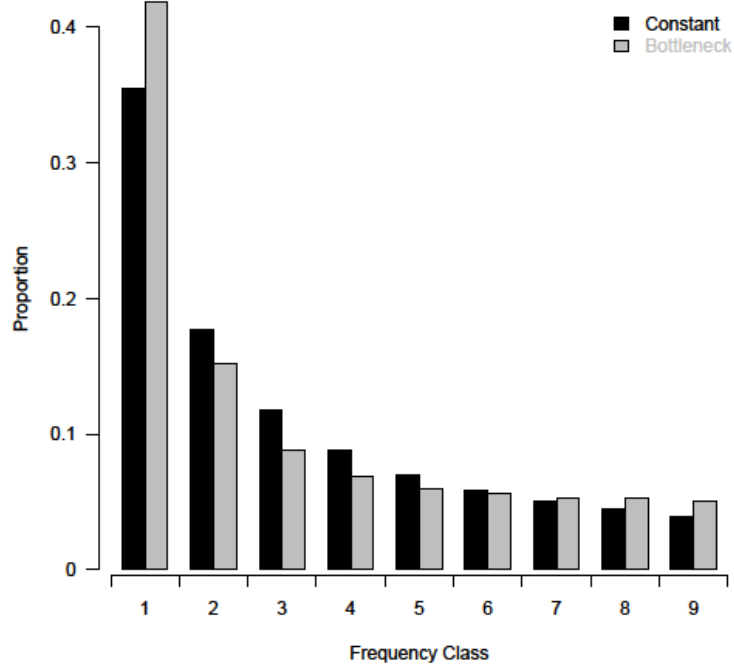

**Figure S2** Mutation frequency spectrums (MFSs) under the constant population size model and the bottleneck scenario.  $n = 10$ ,  $\theta = 1,000$  and the time is scaled so that one unit represents  $4N_0$  generations. For the bottleneck scenario, we assumed the duration of bottleneck  $t_1 = 0.01$ , the time of bottleneck ended  $t_0 = 0.1$ , and  $N_0/N_1 = 10$ , where  $N_0$  is the effective population size before and after the bottleneck,  $N_1$  the effective population size during the bottleneck. The MFS was estimated from  $10^5$  simulated data sets.
