# Supplementary material for: New Software for the Fast Estimation of Population Recombination Rates (FastEPRR) in the Genomic Era
Source: Oxford University Press journal article supplement (doi:10.1534/g3.116.028233), 2016-06-01
Supplement: 028233_figures3.pdf [file 028233_figures3.pdf]

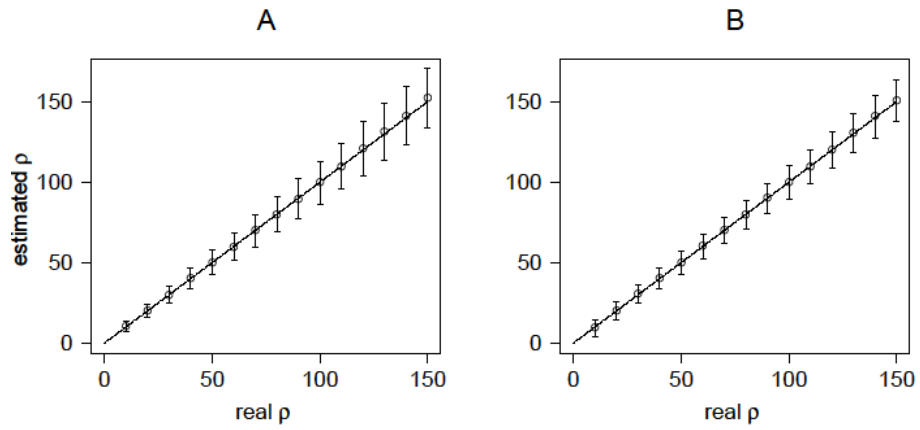

**Figure S3** Comparisons of  $\rho_{FastEPRR}$  when the sample size is very large ( $n = 1000$ ). The mean and the standard deviation of  $\hat{\rho}$  was estimated from 2,000 simulated data conditional on  $\rho$  and  $S = 75$  (A) or 375 (B).
