# Supplementary material for: New Software for the Fast Estimation of Population Recombination Rates (FastEPRR) in the Genomic Era
Source: Oxford University Press journal article supplement (doi:10.1534/g3.116.028233), 2016-06-01
Supplement: 028233_figures4.pdf [file 028233_figures4.pdf]

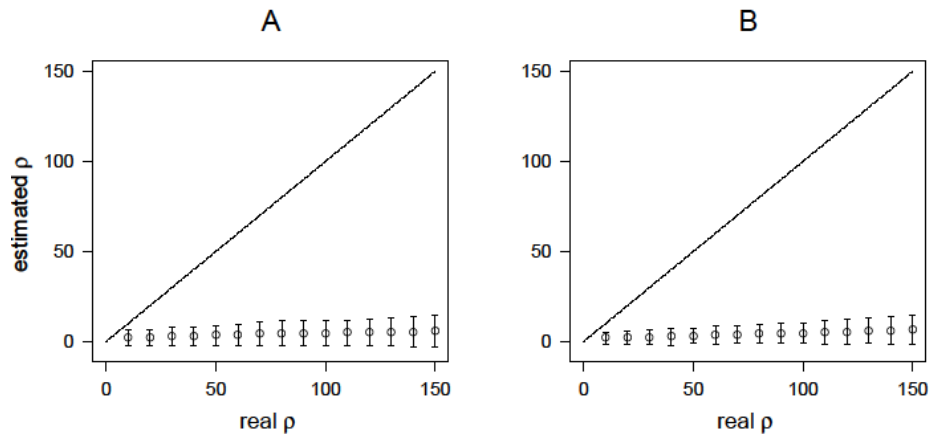

**Figure S4** Comparing the performance of FastEPRR under the population bottleneck model with fixed  $S = 52$  (A) and  $\xi'_2 = 5, \xi'_x = 37$  (B). We assumed  $n = 100$ , the duration of bottleneck  $t_1 = 0.01$ , the time of bottleneck ended  $t_0 = 0.001$ , and  $N_0/N_1 = 100$ , where  $N_0$  is the effective population size before and after the bottleneck,  $N_1$  the effective population size during the bottleneck, and the time is scaled so that one unit represents  $4N_0$  generations.
