# Supplementary material for: New Software for the Fast Estimation of Population Recombination Rates (FastEPRR) in the Genomic Era
Source: Oxford University Press journal article supplement (doi:10.1534/g3.116.028233), 2016-06-01
Supplement: 028233_figures5.pdf [file 028233_figures5.pdf]

### chr1

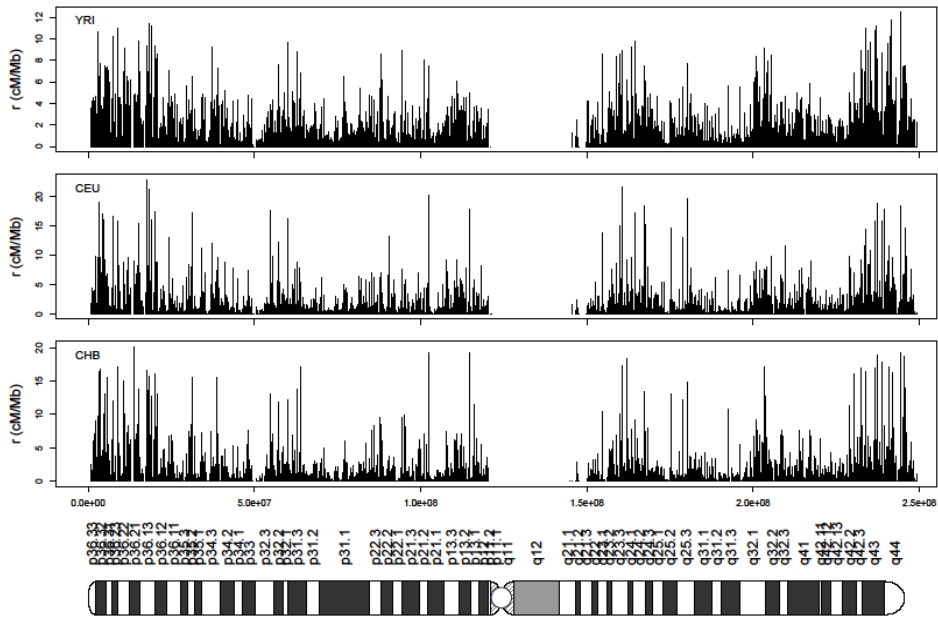

### chr2

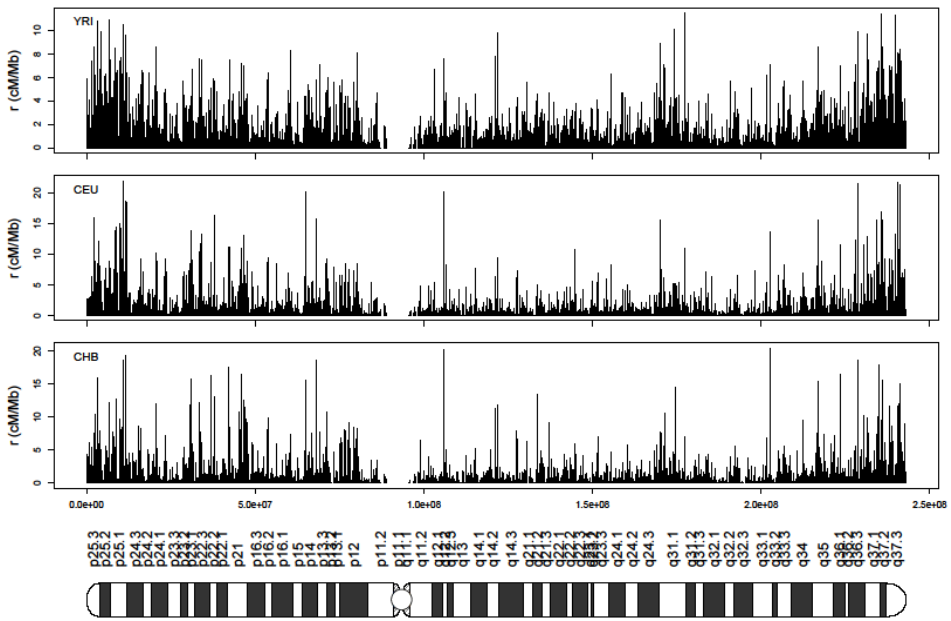

### chr3

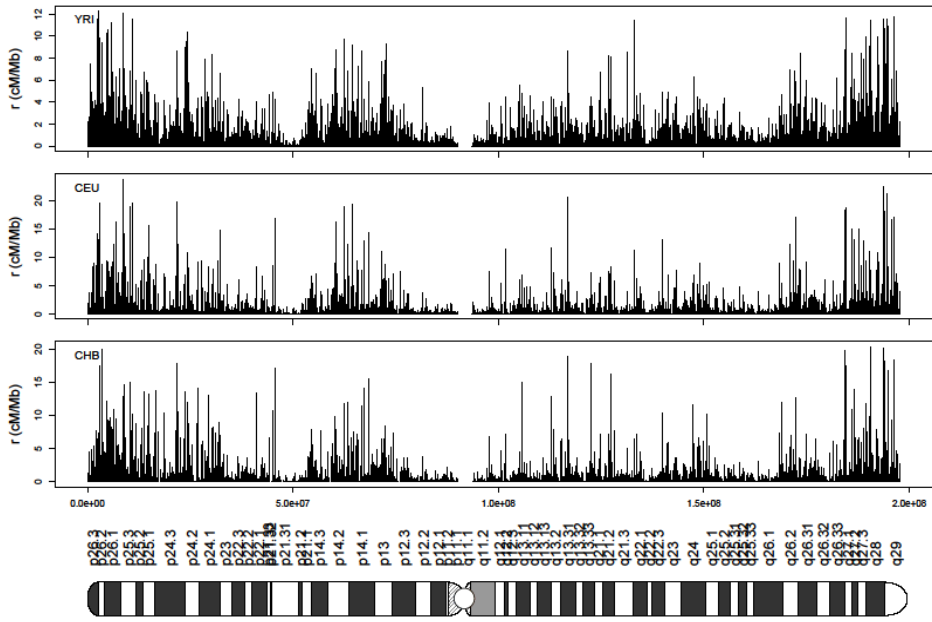

### chr4

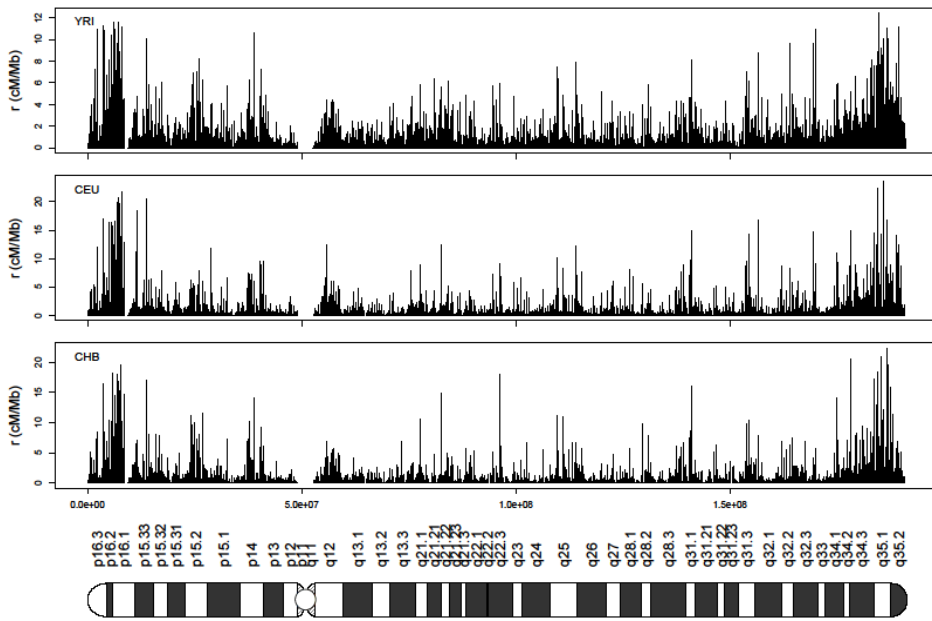

### chr5

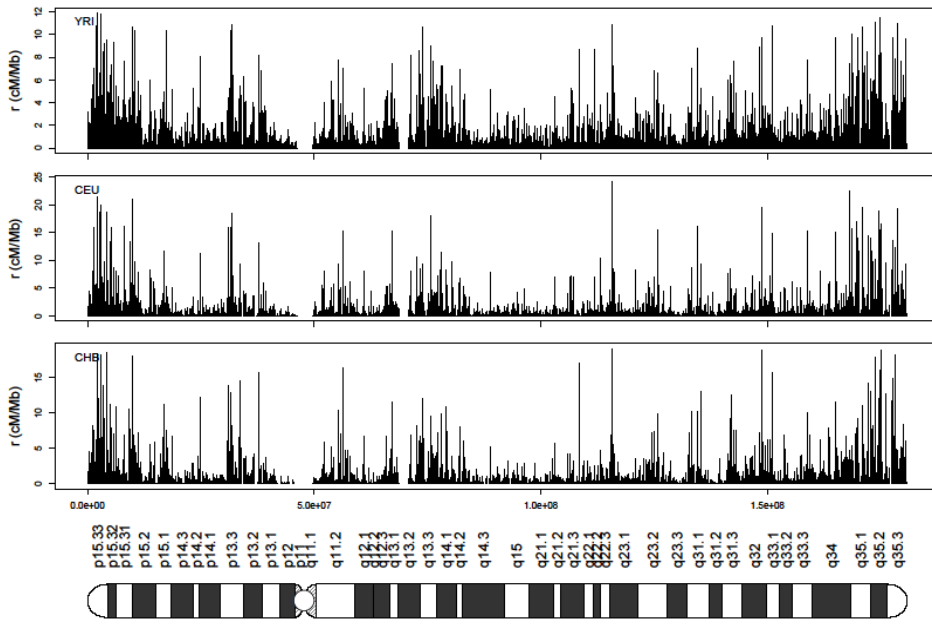

### chr6

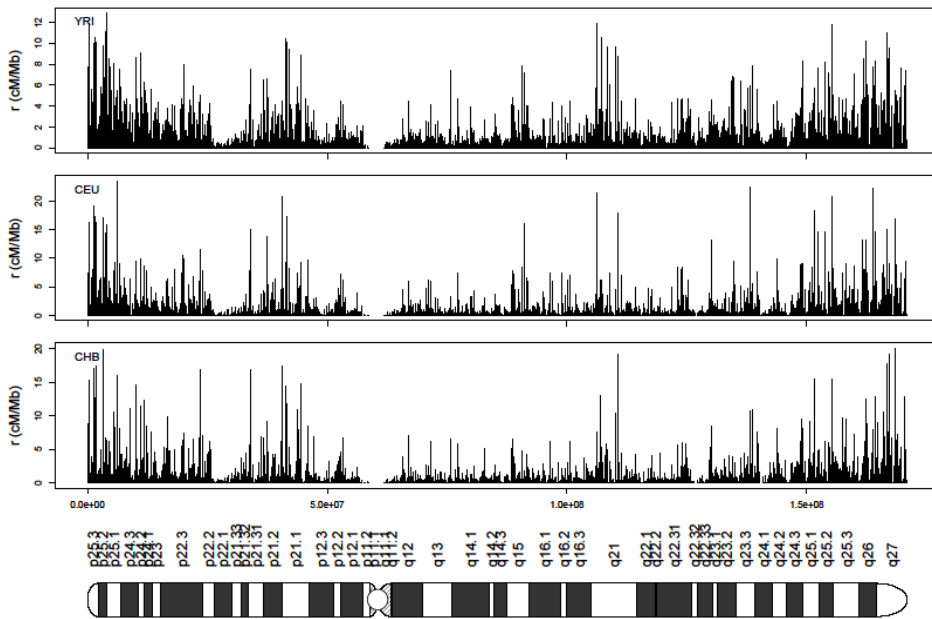

### chr7

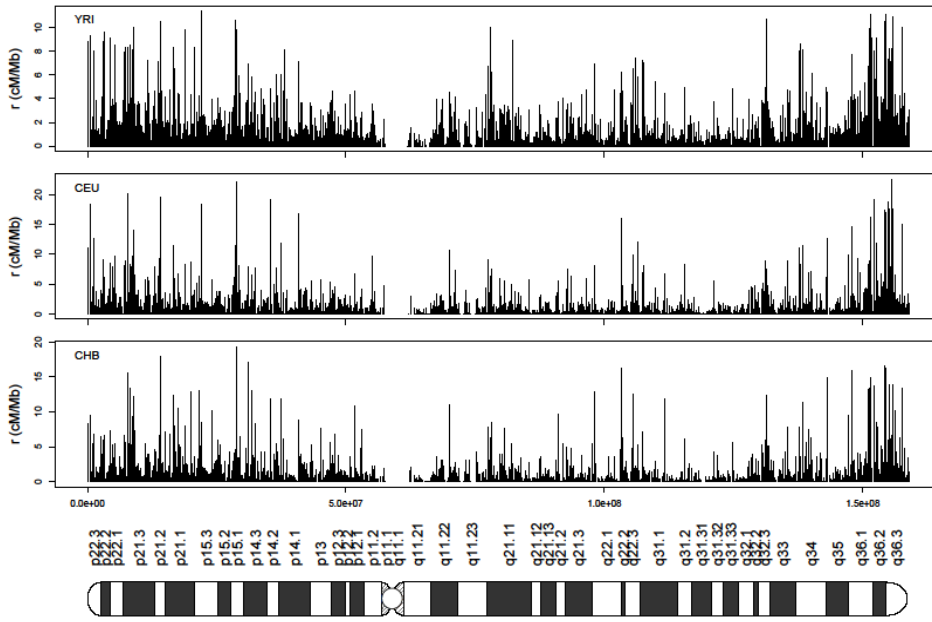

### chr8

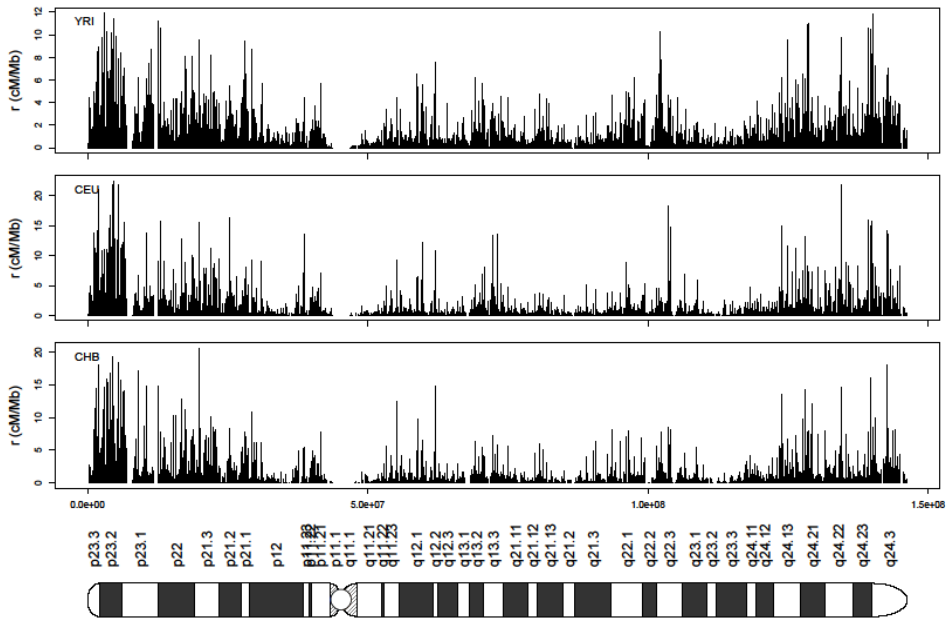

### chr9

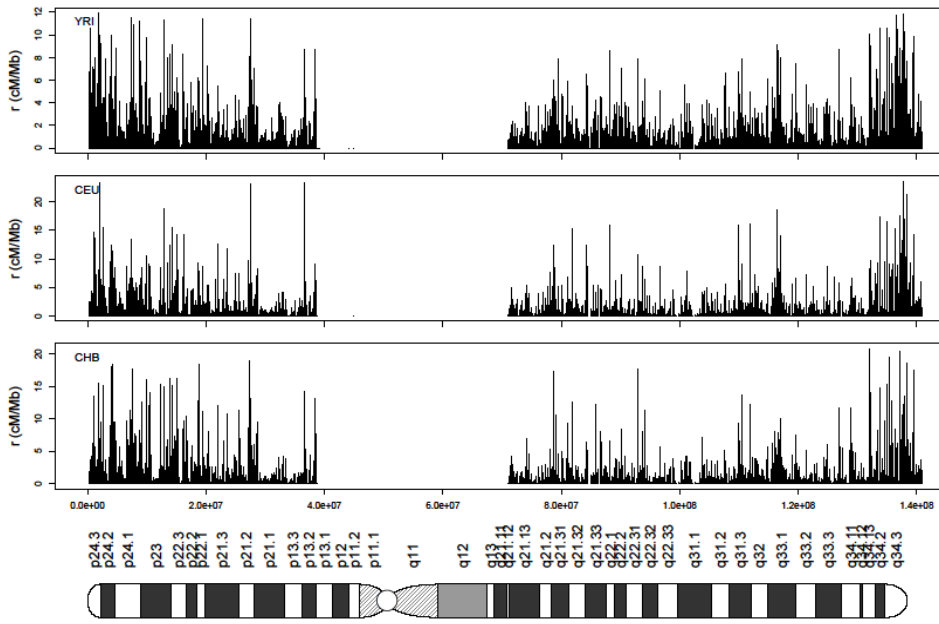

### chr10

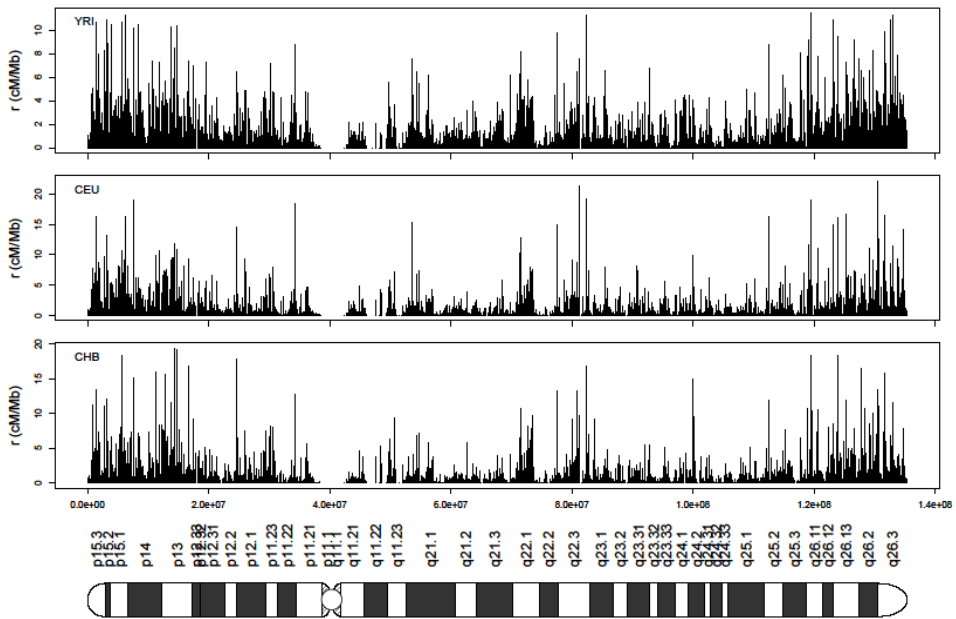

### chr11

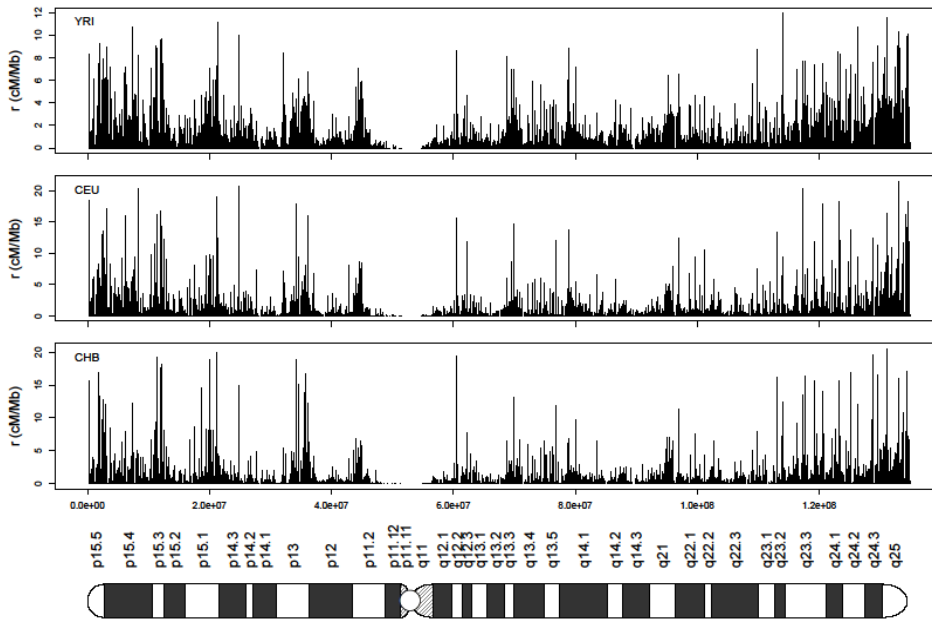

### chr12

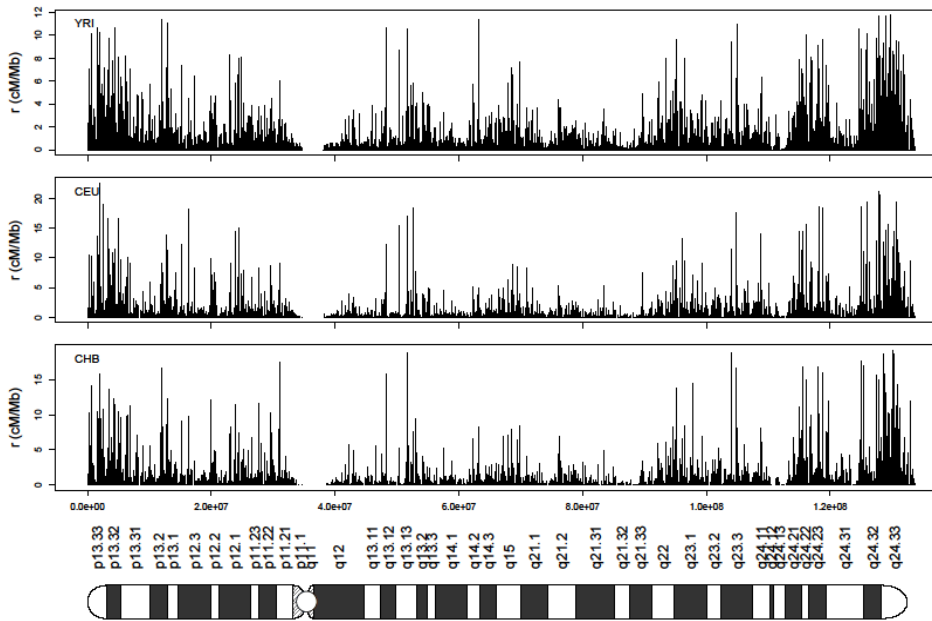

### chr13

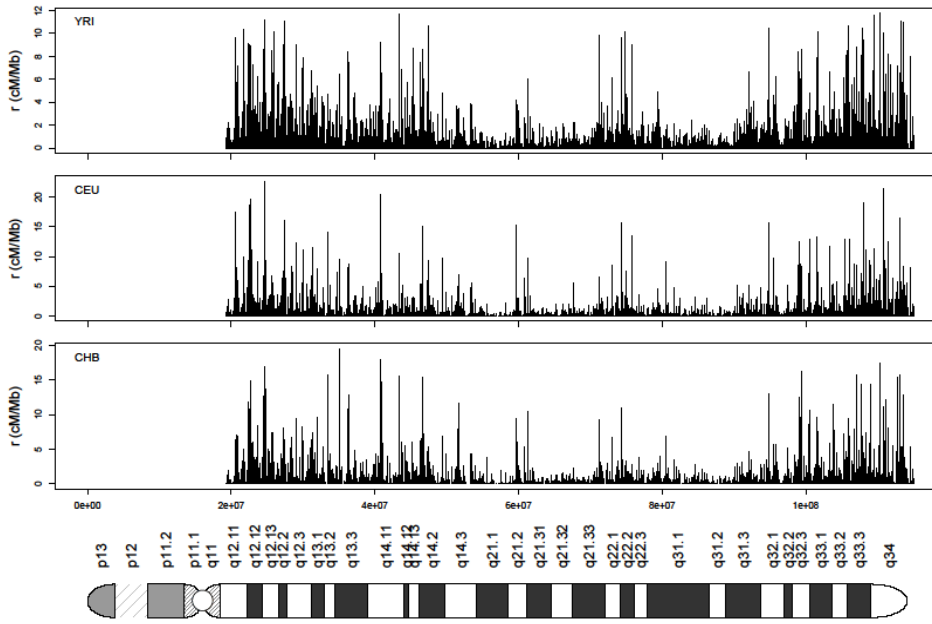

### chr14

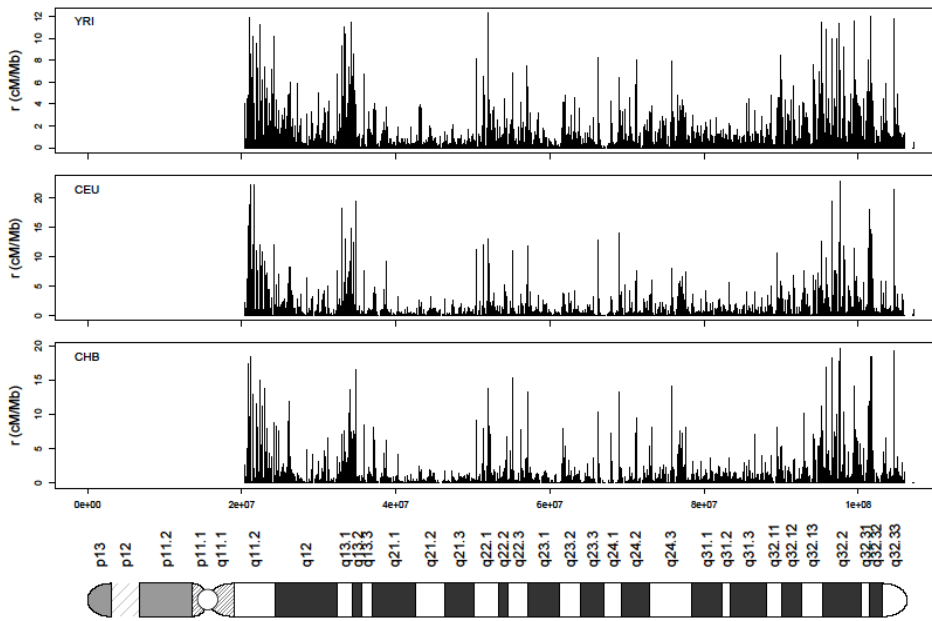

### chr15

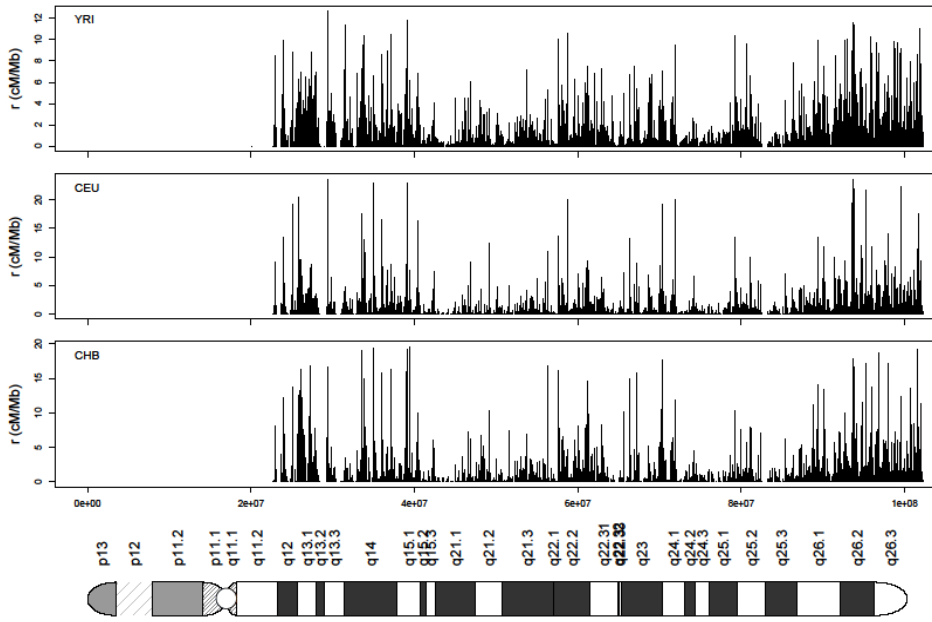

### chr16

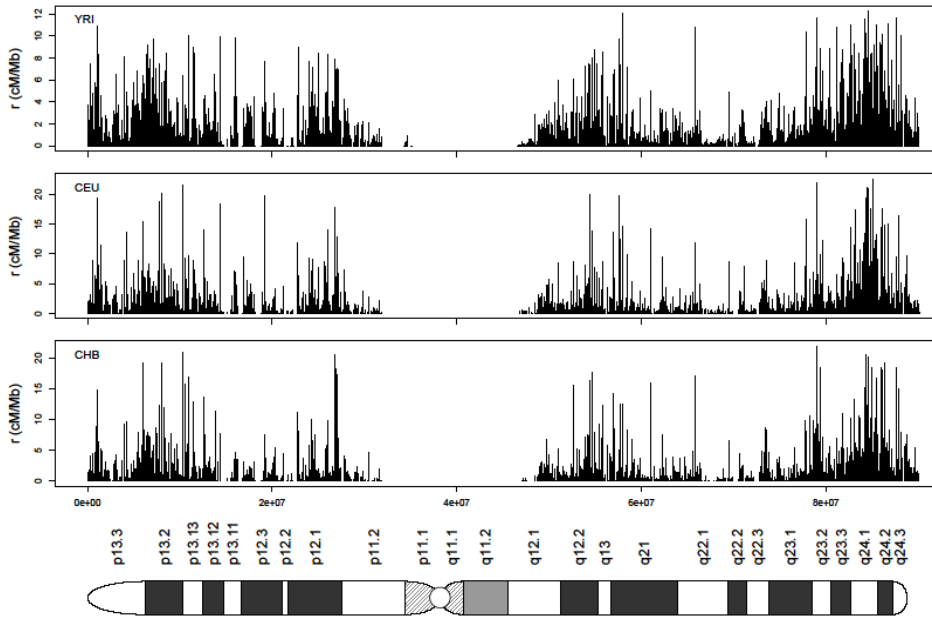



### chr17

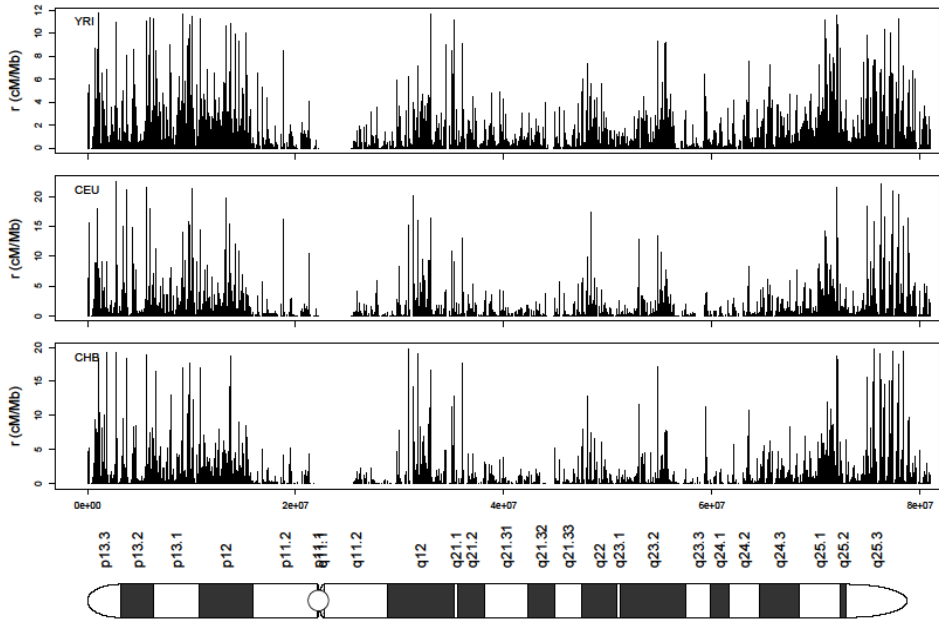

### chr18

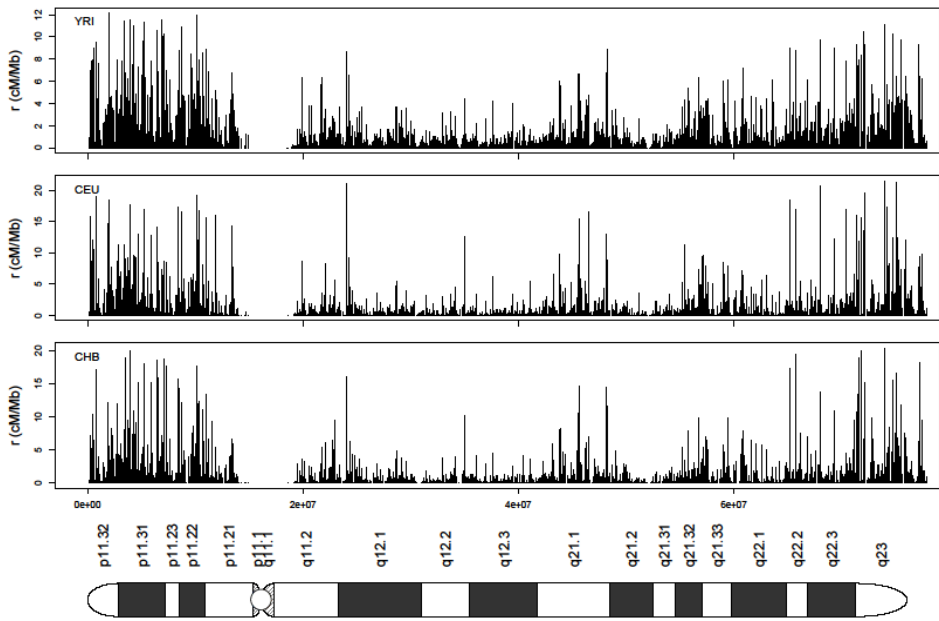

### chr19

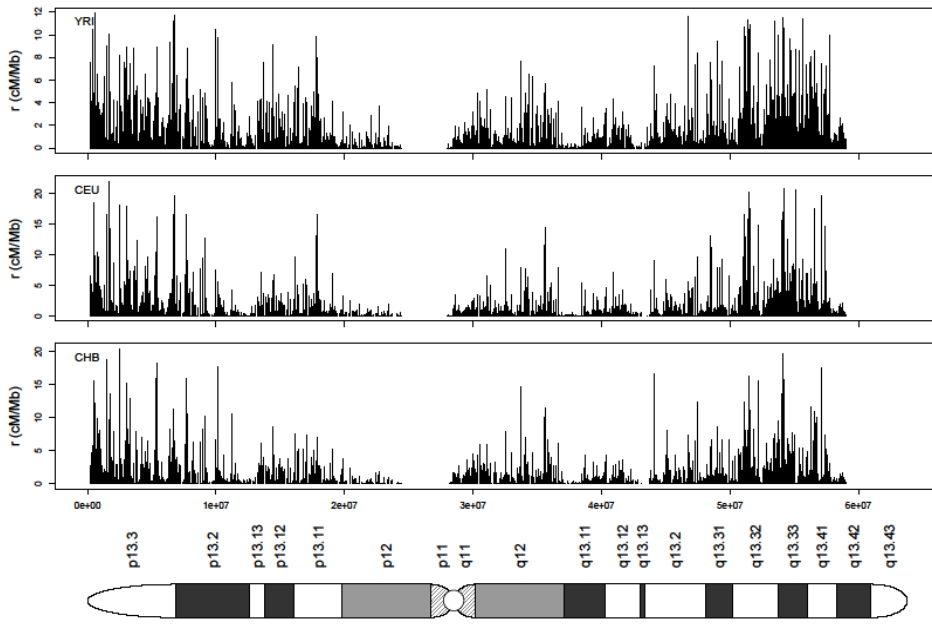

### chr20

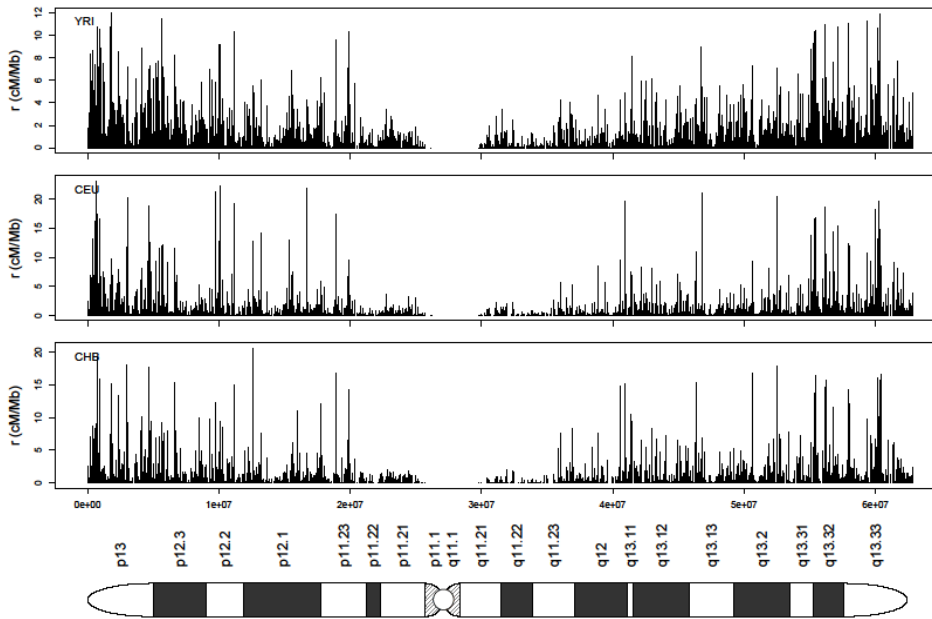

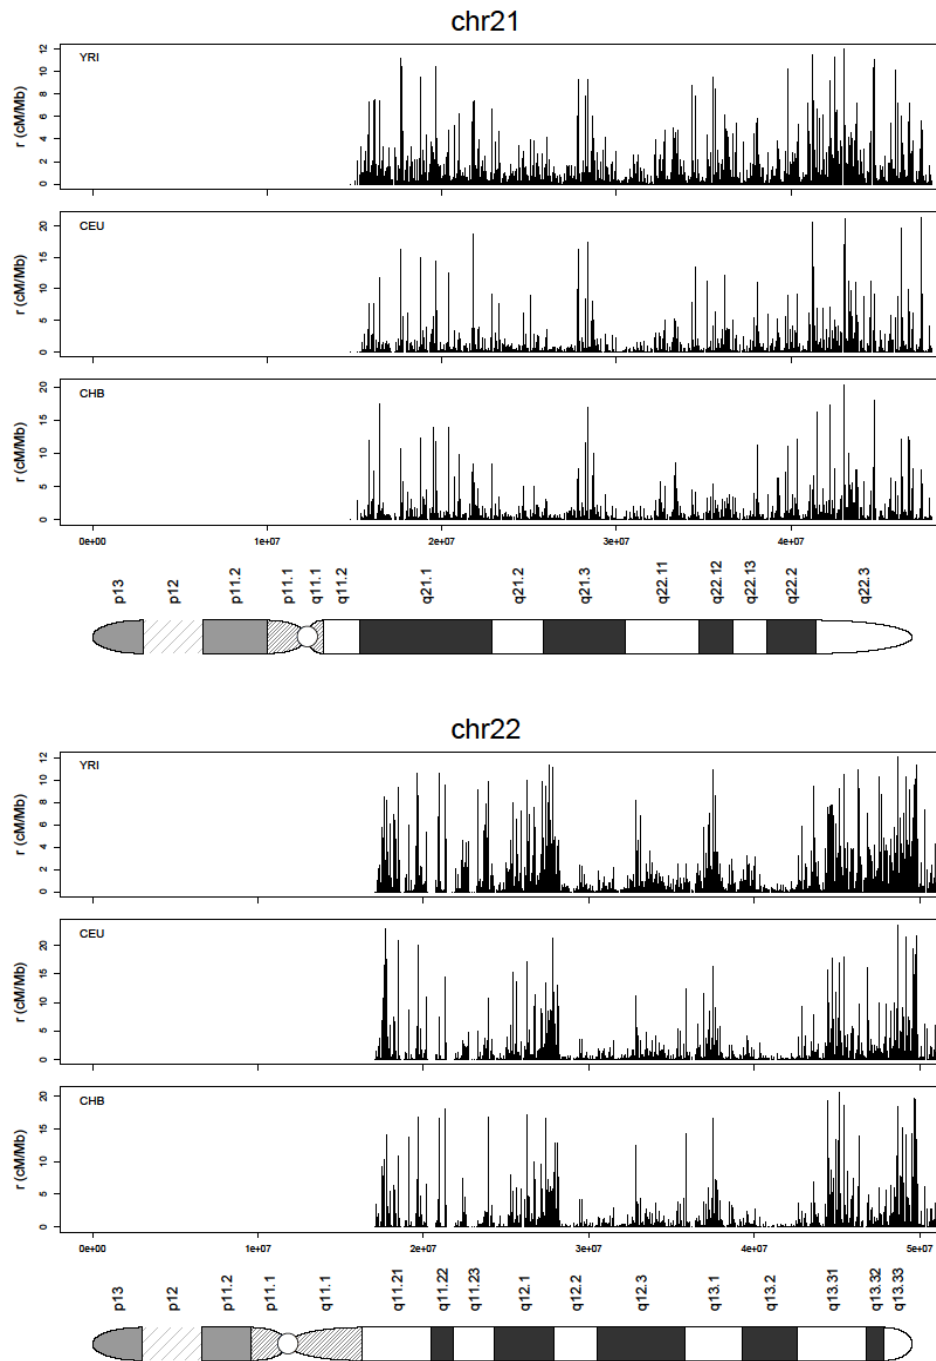

**Figure S5** Recombination rates of the 22 autosomes for three human populations of African (YRI), European (CEU) and East Asian (CHB) ancestry at a 50-kb scale. The cartoon at the bottom is a visualization of the chromosome.
