# Supplementary material for: New Software for the Fast Estimation of Population Recombination Rates (FastEPRR) in the Genomic Era
Source: Oxford University Press journal article supplement (doi:10.1534/g3.116.028233), 2016-06-01
Supplement: 028233_figures7.pdf [file 028233_figures7.pdf]

(A) YRI 50-kb

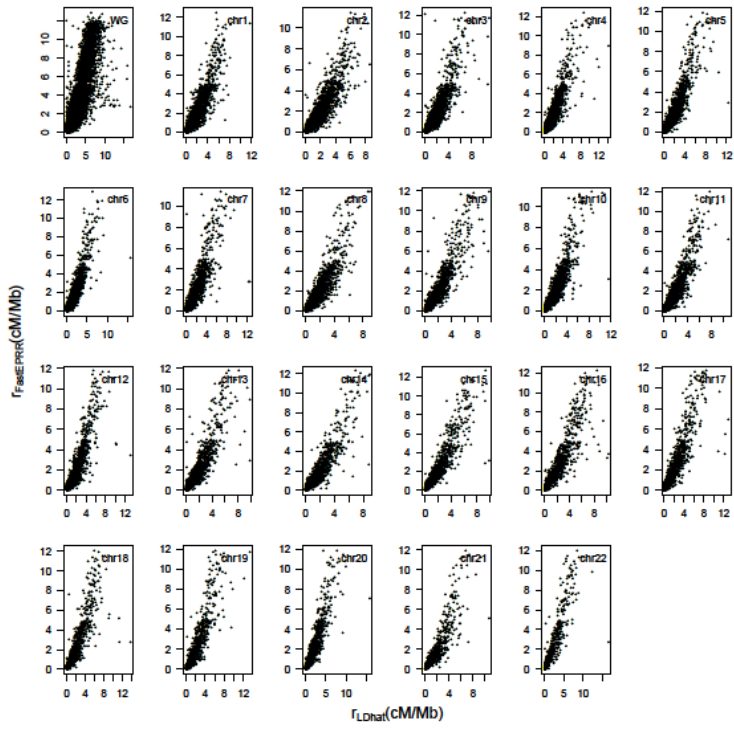

(B) YRI 5-Mb

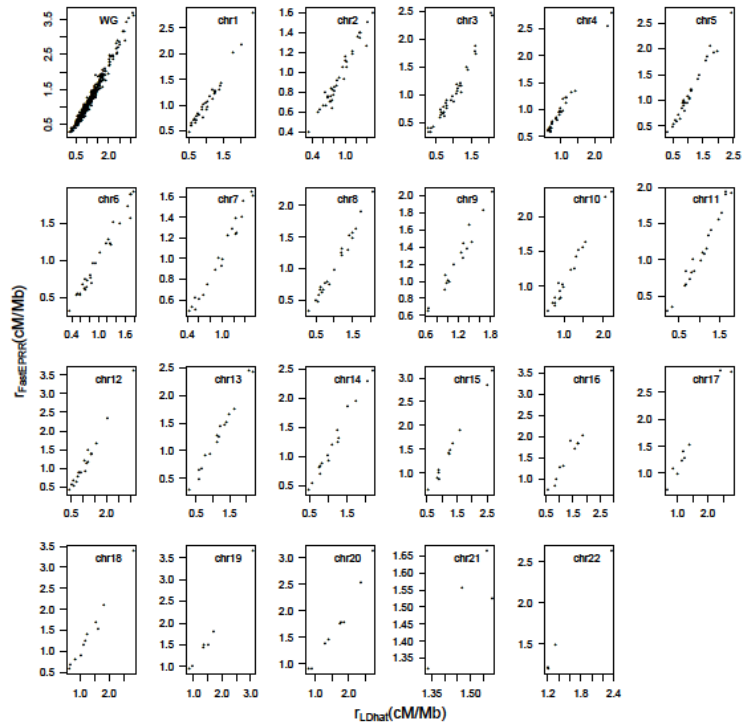

(C) CEU 50-kb

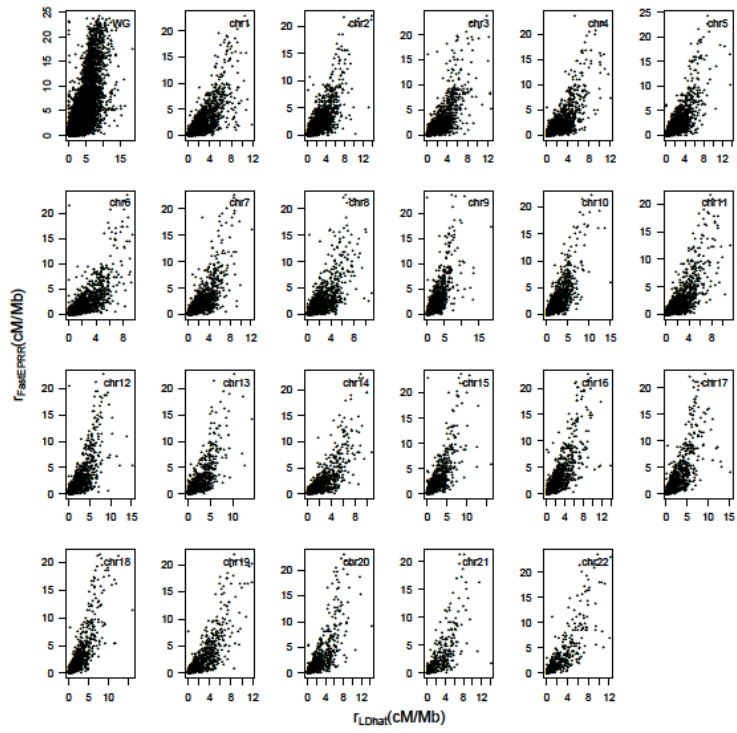

(D) CEU 5-Mb

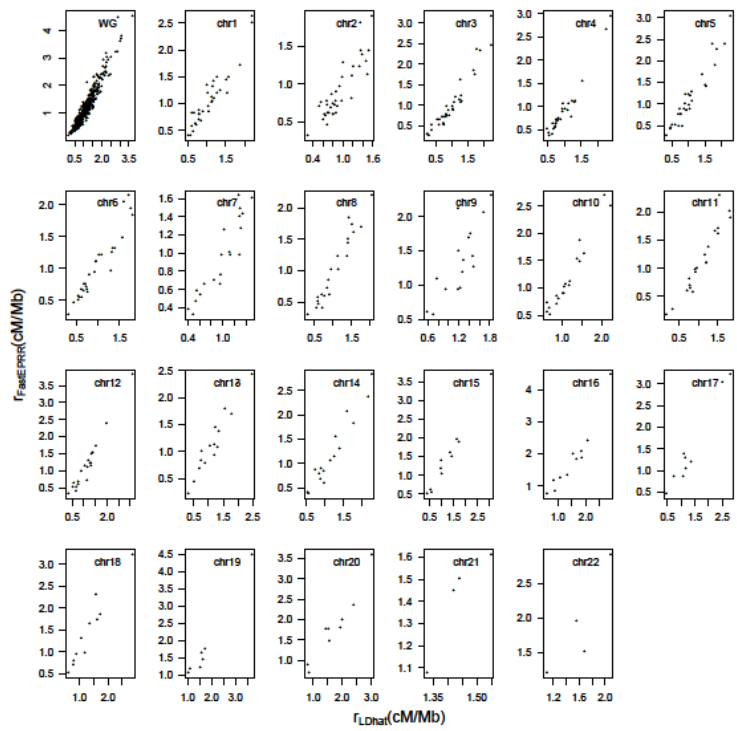

(E) CHB 50-kb

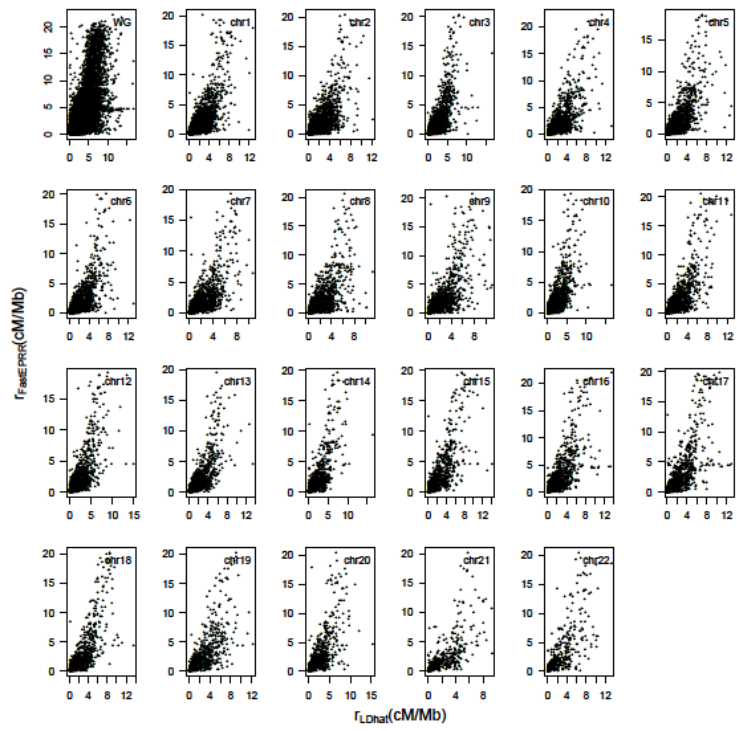

(F) CHB 5-Mb

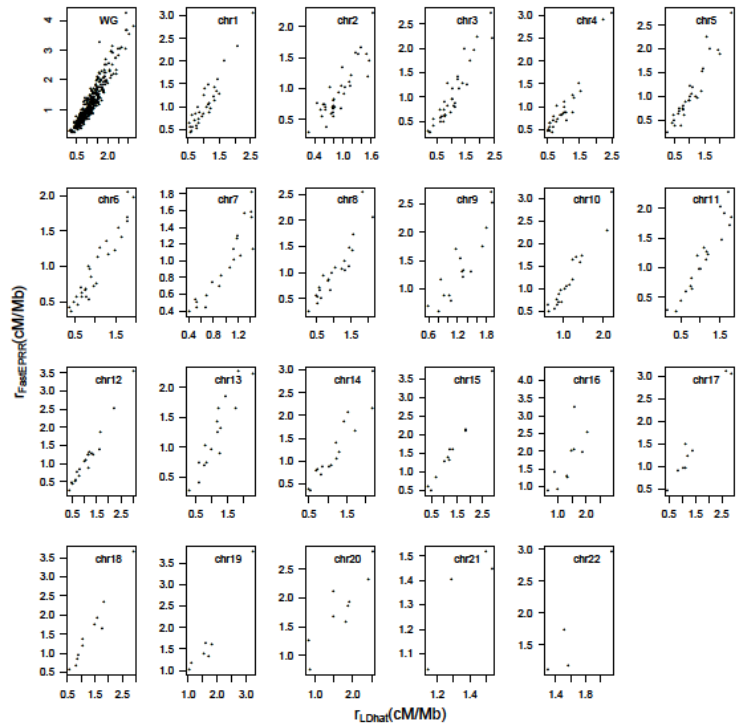

**Figure S7** Comparisons of  $\rho_{FastEPRR}$  and  $\rho_{LDhat}$  maps at 50-kb and 5-Mb scales for African (YRI) (A, B), European (CEU) (C, D) and East Asian (CHB) (E, F), respectively. The scatter plots show the comparison of the whole genome and 22 autosomes.
