# Supplementary material for: New Software for the Fast Estimation of Population Recombination Rates (FastEPRR) in the Genomic Era
Source: Oxford University Press journal article supplement (doi:10.1534/g3.116.028233), 2016-06-01
Supplement: 028233_figures8.pdf [file 028233_figures8.pdf]

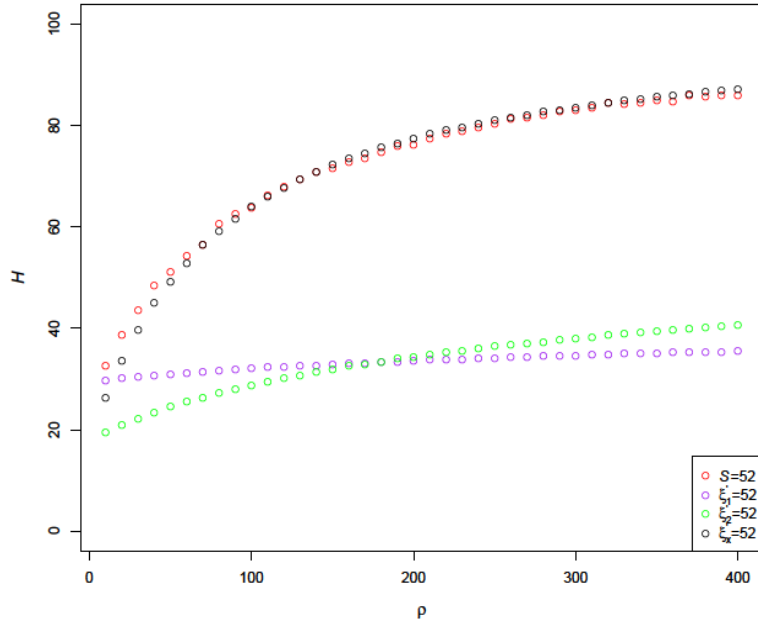

**Figure S8** The relationship between  $H$  and  $\rho$  under the condition of  $\xi_1', \xi_2', \xi_x'$  and  $S$  separately.  $n = 100, S = 52, \xi_1' = 52, \xi_2' = 52, \xi_x' = 52$ . The open circles represent the mean of all  $H$  for each  $\rho \in [10, 400]$ .
