# Supplementary material for: New Software for the Fast Estimation of Population Recombination Rates (FastEPRR) in the Genomic Era
Source: Oxford University Press journal article supplement (doi:10.1534/g3.116.028233), 2016-06-01
Supplement: 028233_tables1.pdf [file 028233_tables1.pdf]

**Table S1 RMSE of  $\rho_{FastEPRR}$  when the sample size increases**

| $n$ | RMSE | $n$  | RMSE |
|-----|------|------|------|
| 50  | 17.6 | 500  | 8.2  |
| 100 | 12.3 | 600  | 8.0  |
| 200 | 9.8  | 700  | 8.0  |
| 300 | 8.7  | 800  | 7.8  |
| 400 | 8.4  | 1000 | 7.7  |

The RMSE of  $\hat{\rho}$  was estimated from 2,000 simulated data conditional on real  $\rho = 50$  and

$S = 75$ .
