# Supplementary material for: New Software for the Fast Estimation of Population Recombination Rates (FastEPRR) in the Genomic Era
Source: Oxford University Press journal article supplement (doi:10.1534/g3.116.028233), 2016-06-01
Supplement: 028233_tables2.pdf [file 028233_tables2.pdf]

**Table S2 Comparison of  $\rho_{FastEPRR}$ ,  $\rho_{gam}$ ,  $\rho_{LDhat}$  and  $\rho_{comb}$  for each sample size measured by RMSE**

| Real   | $n = 50$ |      |       |          | $n = 100$ |      |       |          | $n = 200$ |      |       |          |
|--------|----------|------|-------|----------|-----------|------|-------|----------|-----------|------|-------|----------|
| $\rho$ | FastEPRR | gam  | LDhat | combined | FastEPRR  | gam  | LDhat | combined | FastEPRR  | gam  | LDhat | combined |
| 10     | 5.9      | 15.5 | 5.4   | 4.0      | 5.0       | 11.8 | 4.5   | 3.3      | 4.4       | 9.0  | 4.3   | 3.0      |
| 20     | 8.5      | 13.6 | 8.3   | 5.9      | 6.8       | 7.2  | 7.3   | 5.0      | 5.8       | 4.5  | 6.5   | 4.3      |
| 30     | 11.1     | 20.1 | 11.4  | 8.0      | 8.5       | 11.4 | 9.9   | 6.6      | 7.2       | 8.5  | 8.4   | 5.5      |
| 40     | 15.0     | 25.8 | 15.2  | 10.7     | 10.6      | 15.0 | 12.5  | 8.2      | 8.6       | 11.2 | 10.4  | 6.7      |
| 50     | 18.6     | 30.4 | 18.4  | 13.1     | 12.7      | 17.4 | 14.6  | 9.7      | 10.0      | 12.6 | 12.4  | 7.9      |
| 60     | 22.1     | 32.6 | 21.6  | 15.6     | 15.0      | 19.1 | 17.4  | 11.5     | 11.6      | 13.5 | 14.2  | 9.2      |
| 70     | 25.7     | 33.6 | 24.6  | 18.0     | 17.7      | 21.2 | 19.4  | 13.0     | 13.1      | 14.8 | 16.4  | 10.4     |
| 80     | 27.9     | 33.2 | 27.4  | 19.7     | 20.3      | 22.8 | 21.8  | 15.0     | 14.9      | 16.5 | 18.1  | 11.7     |
| 90     | 29.9     | 33.2 | 30.3  | 21.5     | 22.5      | 24.2 | 24.1  | 16.6     | 16.9      | 18.5 | 20.2  | 13.2     |
| 100    | 31.6     | 29.9 | 33.2  | 23.2     | 25.0      | 24.6 | 25.7  | 17.9     | 18.8      | 20.4 | 22.2  | 14.6     |
| 110    | 32.3     | 27.4 | 35.4  | 24.0     | 26.0      | 24.6 | 27.9  | 19.1     | 20.4      | 21.0 | 24.0  | 15.8     |
| 120    | 33.1     | 24.7 | 36.7  | 24.8     | 27.1      | 24.2 | 29.3  | 20.0     | 21.9      | 21.5 | 25.8  | 17.0     |
| 130    | 33.5     | 22.7 | 37.6  | 25.0     | 27.8      | 22.7 | 30.7  | 20.7     | 22.7      | 21.0 | 27.6  | 18.0     |
| 140    | 33.7     | 22.0 | 37.7  | 25.5     | 28.0      | 21.5 | 31.7  | 21.0     | 22.7      | 19.7 | 28.9  | 18.5     |
| 150    | 34.3     | 22.9 | 37.9  | 26.0     | 27.7      | 20.9 | 32.0  | 21.2     | 22.7      | 18.3 | 29.2  | 18.5     |

The parameters in Figure 1 were used, unless noted otherwise.
