# Supplementary material for: New Software for the Fast Estimation of Population Recombination Rates (FastEPRR) in the Genomic Era
Source: Oxford University Press journal article supplement (doi:10.1534/g3.116.028233), 2016-06-01
Supplement: 028233_tables3.pdf [file 028233_tables3.pdf]

**Table S3 Computing time to analyze the genome-wide polymorphism data for three human populations**

| Population | Scanning (h) | Estimating (h) | Merging (h) | Total (h) |
|------------|--------------|----------------|-------------|-----------|
| YRI        | 9.0          | 56.7           | 0.6         | 66.3      |
| CEU        | 8.6          | 36.5           | 0.6         | 45.7      |
| CHB        | 8.7          | 39.8           | 0.5         | 49.0      |

The unit of measurement is given in hours (h). A single CPU core of a computer with an AMD Opteron(tm) 800MHz processor was used. As expected, the waiting/computing time will be dramatically shortened when a computer cluster is available.
