# Supplementary material for: New Software for the Fast Estimation of Population Recombination Rates (FastEPRR) in the Genomic Era
Source: PubMed Central journal article supplement (PMC4889653; doi:10.1534/g3.116.028233), 2016-03-29
Supplement: supp_g3.116.028233_FileS1.pdf [file supp_g3.116.028233_FileS1.pdf]

### File S1. The method to consider variable recombination rates within windows

Given  $\hat{\rho}_1$ ,  $\hat{\rho}_2$  and  $\hat{\rho}_3$  (Figure S1), the following pseudocode describes the solving procedure for considering the variable recombination rates within windows.

If ( $\hat{\rho}_2 \geq (\hat{\rho}_1 + \hat{\rho}_3)$ ) {

#According to the constraint condition (2)

$$x_1 = 0, x_2 = \frac{(\hat{\rho}_2 - \hat{\rho}_1 - \hat{\rho}_3)}{3} + \hat{\rho}_1, x_3 = \frac{(\hat{\rho}_2 - \hat{\rho}_1 - \hat{\rho}_3)}{3} + \hat{\rho}_3, x_4 = 0.$$

} else {

#According to the constraint condition (3)

Let  $C_2 = \hat{\rho}_1$ ,  $C_3 = \hat{\rho}_2 - \hat{\rho}_1$ ,  $C_4 = \hat{\rho}_3 - \hat{\rho}_2 + \hat{\rho}_1$ , then  $x_2 = C_2 - x_1$ ,  $x_3 = C_3 + x_1$ ,  $x_4 = C_4 -$

$x_1$ . And

$$\begin{aligned} f_2 &= x_1 x_2 x_3 x_4 = x_1 (C_2 - x_1) (C_3 + x_1) (C_4 - x_1) \\ &= x_1^4 + (C_3 - C_2 - C_4) x_1^3 + (C_2 C_4 - C_3 C_4 - C_3 C_2) x_1^2 + C_2 C_3 C_4 x_1 \end{aligned}$$

Let  $f_2'$  be the derivative of  $f_2$ , then

$$f_2' = 4x_1^3 + 3(C_3 - C_2 - C_4)x_1^2 + 2(C_2 C_4 - C_3 C_4 - C_3 C_2)x_1 + C_2 C_3 C_4$$

According to the constraint condition (1), let  $L = \max\{0, -C_3\}$  and  $U = \min\{C_2, C_4\}$ . We

define  $B = \{L, U, \text{all real roots of } f_2'\}$ ,  $\forall b \in B$ ,  $b^* = \text{maximize } f_2(b)$ . Let  $x_1 = b^*$ , then

$x_2 = C_2 - b^*$ ,  $x_3 = C_3 + b^*$  and  $x_4 = C_4 - b^*$ .

}
